# Supplementary material for: Road traffic has a consistent negative impact on a wide range of bird species in different habitats
Source: Research Square preprint supplement (doi:10.21203/rs.3.rs-5548583/v1), 2025-01-13
Supplement: Supplementary file 1 [file 361c67720e0e846a80a23f16.docx]

Online Resource 2 Effect distances and effect sizes per species and ecological species group

**Table OR2** The effect distances and effect sizes based on the full model for species and ecological species groups. Species within ecological species group are ordered by sample size (n). NA: no threshold estimated; NS: not significant. n is the number of calculated densities per distance contour. The territory densities (mean number of territories per ha) within and outside the effect distances are also provided for species for which density increases with distance from the road up to a threshold

| ***Ecological  species group*** | ***species  (common name)*** | ***species  (scientific name)*** | ***Effect distance ± SE (m)*** | ***Effect size (per 100 m)*** | ***P*** | ***n*** | ***density ± SD within effect distance*** | ***density ± SD outside effect distance*** |
| --- | --- | --- | --- | --- | --- | --- | --- | --- |
| Forest | Eurasian Blackcap | *Sylvia atricapilla* | 117 ± 24 | -0.297 ± 0.139 | 0.032 | 3821 |  |  |
|  | Eurasian Wren | *Nannus troglodytes* | NA | NA | NS | 3720 |  |  |
|  | Common Chiffchaff | *Phylloscopus collybita* | 650 ± 71 | 0.018 ± 0.010 | 0.050 | 3276 | 0.74 ± 0.56 | 0.81 ± 0.64 |
|  | Common Blackbird | *Turdus merula* | 697 ± 49 | 0.045 ± 0.009 | <0.001 | 2938 | 0.67 ± 0.51 | 0.81 ± 0.93 |
|  | Great Tit | *Parus major* | 626 ± 59 | 0.050 ± 0.011 | <0.001 | 2766 | 0.62 ± 0.47 | 0.75 ± 0.76 |
|  | Common Chaffinch | *Fringilla coelebs* | 616 ± 83 | 0.034 ± 0.012 | 0.003 | 2470 | 0.60 ± 0.48 | 0.77 ± 0.79 |
|  | Eurasian Blue Tit | *Cyanistes caeruleus* | 509 ± 55 | 0.068 ± 0.015 | <0.001 | 2052 | 0.55 ± 0.92 | 0.67 ± 0.66 |
|  | Garden Warbler | *Sylvia borin* | 508 ± 43 | 0.077 ± 0.015 | <0.001 | 2029 | 0.52 ± 0.40 | 0.65 ± 0.59 |
|  | Short-toed Treecreeper | *Certhia brachydactyla* | 650 ± 57 | 0.054 ± 0.013 | <0.001 | 1896 | 0.51 ± 0.79 | 0.61 ± 0.64 |
|  | European Robin | *Erithacus rubecula* | 787 ± 95 | 0.060 ± 0.011 | <0.001 | 1870 | 0.57 ± 0.45 | 0.76 ± 0.90 |
|  | Song Thrush | *Turdus philomelos* | 663 ± 89 | 0.027 ± 0.011 | 0.011 | 1800 | 0.49 ± 0.37 | 0.64 ± 0.70 |
|  | Common Wood Pigeon | *Columba palumbus* | 650 ± 97 | 0.033 ± 0.013 | 0.015 | 1738 | 0.52 ± 0.50 | 0.67 ± 0.65 |
|  | Great Spotted Woodpecker | *Dendrocopos major* | 644 ± 45 | 0.087 ± 0.013 | <0.001 | 1502 | 0.43 ± 0.28 | 0.54 ± 0.65 |
|  | Dunnock | *Prunella modularis* | 569 ± 69 | 0.067 ± 0.014 | <0.001 | 1390 | 0.52 ± 0.92 | 0.71 ± 1.15 |
|  | Eurasian Nuthatch | *Sitta europea* | 700 ± 75 | 0.054 ± 0.021 | 0.011 | 884 | 0.46 ± 0.33 | 0.58 ± 0.77 |
|  | Common Starling | *Sturnus vulgaris* | NA | NA | NS | 735 |  |  |
|  | Eurasian Jay | *Garrulus glandarius* | 674 ± 86 | 0.042 ± 0.016 | 0.008 | 712 | 0.38 ± 0.27 | 0.50 ± 0.64 |
|  | European Goldfinch | *Carduelis carduelis* | 650 ± 80 | 0.075 ± 0.021 | <0.001 | 679 | 0.54 ± 0.94 | 0.61 ± 1.24 |
|  | Goldcrest | *Regulus regulus* | NA | NA | NS | 598 |  |  |
|  | Long-tailed Tit | *Aegithalos caudatus* | 650 ± 60 | 0.069 ± 0.017 | <0.001 | 548 | 0.38 ± 0.25 | 0.58 ± 0.85 |
|  | European Greenfinch | *Chloris chloris* | 550 ± 52 | 0.113 ± 0.029 | <0.001 | 521 | 0.48 ± 0.57 | 0.59 ± 0.53 |
|  | Stock Dove | *Columba oenas* | NA | NA | NS | 509 |  |  |
|  | Hawfinch | *Coccothraustes coccothraustes* | 830 ± 70 | 0.063 ± 0.023 | 0.007 | 442 | 0.39 ± 0.32 | 0.46 ± 0.39 |
|  | European Crested Tit | *Lophophanus cristatus* | 700 ± 84 | 0.090 ± 0.030 | 0.004 | 406 | 0.37 ± 0.27 | 0.44 ± 0.40 |
|  | European Pied Flycatcher | *Ficedula hypoleuca* | 602 ± 130 | 0.107 ± 0.035 | 0.003 | 380 | 0.40 ± 0.63 | 0.59 ± 0.97 |
|  | Eurasian Green Woodpecker | *Picus viridis* | 700 ± 60 | 0.147 ± 0.030 | <0.001 | 370 | 0.48 ± 1.23 | 0.55 ± 0.53 |
|  | Spotted Flycatcher | *Muscicapa striata* | NA | NA | NS | 366 |  |  |
|  | Common Buzzard | *Buteo buteo* | NA | NA | NS | 354 |  |  |
|  | Willow Tit | *Poecile montanus* | 453 ± 93 | 0.081 ± 0.036 | 0.026 | 337 | 0.38 ± 0.36 | 0.46 ± 0.31 |
|  | Coal Tit | *Periparus ater* | NA | NA | NS | 303 |  |  |
|  | Eurasian Bullfinch | *Pyrrhula pyrrhula* | NA | NA | NS | 301 |  |  |
|  | Marsh tit | *Poecile palustris* | NA | NA | NS | 276 |  |  |
|  | Mistle Thrush | *Turdus viscivorus* | 704 ± 58 | 0.140 ± 0.038 | <0.001 | 267 | 0.37 ± 0.29 | 0.48 ± 0.69 |
|  | Lesser Spotted Woodpecker | *Dryobates minor* | NA | NA | NS | 264 |  |  |
|  | Common Nightingale | *Luscinia megarhynchos* | NA | NA | NA | 234 |  |  |
|  | Common Firecrest | *Regulus ignicapilla* | 1050 ± 49 | 0.096 ± 0.046 | 0.039 | 133 | 0.38 ± 0.20 | 0.46 ± 0.25 |
|  | Tawny Owl | *Strix aluco* | 432 ± 61 | 0.329 ± 0.096 | <0.001 | 118 | 0.31 ± 0.13 | 0.49 ± 0.42 |
|  | Northern Goshawk | *Accipiter gentilis* | 750 ± 44 | 0.087 ± 0.029 | 0.004 | 103 | 0.41 ± 0.10 | 0.41 ± 0.29 |
|  | Middle Spotted Woodpecker | *Dendropicos medius* | NA | NA | NS | 100 |  |  |
|  | Woodcock | *Scolopax rusticola* | NA | NA | NA | 97 |  |  |
|  | Black Woodpecker | *Dryocopus martius* | 605 ± 81 | 0.193 ± 0.061 | 0.003 | 83 | 0.29 ± 0.12 | 0..35 ± 0.24 |
|  | Eurasian Golden Oriole | *Oriolus oriolus* | NA | NA | NS | 75 |  |  |
|  | Wood Warbler | *Phylloscopus sibilatrix* | 1300 ± 74 | -0.221 ± 0.061 | 0.001 | 55 |  |  |
|  | Eurasian Sparrowhawk | *Accipiter nisus* | 204 ± 70 | 0.639 ± 0.242 | 0.014 | 55 | 0.47 ± 0.45 | 0.44 ± 0.27 |
|  | Long-eared Owl | *Asio otus* | NA | NA | NA | 34 |  |  |
|  | Eurasian Hobby | *Falco subbuteo* | NA | NA | NA | 16 |  |  |
|  | Crossbill | *Loxia curvirostra* | NA | NA | NS | 13 |  |  |
|  | European Honey Buzzard | *Pernis apivorus* | NA | NA | NA | 10 |  |  |
|  | Treecreeper | *Certhia familiaris* | NA | NA | NA | 8 |  |  |
|  | Northern Raven | *Corvus corax* | NA | NA | NA | 3 |  |  |
|  | Eurasian Siskin | *Spinus spinus* | NA | NA | NA | 3 |  |  |
|  | Red Kite | *Milvus milvus* | NA | NA | NA | 1 |  |  |
| Marsh | Eurasian Reed Warbler | *Acrocephalus scirpaceus* | 546 ± 49 | 0.097 ± 0.013 | <0.001 | 3706 | 0.86 ± 0.88 | 1.17 ± 1.21 |
|  | Mallard | *Anas platyrhynchos* | 600 ± 42 | 0.067 ± 0.012 | <0.001 | 3094 | 0.75 ± 0.91 | 0.81 ± 1.04 |
|  | Eurasian Coot | *Fulica atra* | 517 ± 34 | 0.095 ± 0.014 | <0.001 | 2670 | 0.63 ± 0.64 | 0.77 ± 0.91 |
|  | Reed Bunting | *Emberiza schoeniclus* | 505 ± 61 | 0.076 ± 0.018 | <0.001 | 2664 | 0.60 ± 0.56 | 0.83 ± 0.90 |
|  | Marsh Warbler | *Acrocephalus palustris* | 553 ± 31 | 0.109 ± 0.015 | <0.001 | 2148 | 0.59 ± 0.56 | 0.76 ± 0.77 |
|  | Sedge Warbler | *Acrocephalus schoenobaenus* | 550 ± 112 | 0.061 ± 0.021 | 0.004 | 2063 | 0.64 ± 0.57 | 1.13 ± 1.32 |
|  | Gadwall | *Mareca strepera* | 889 ± 63 | 0.041 ± 0.009 | <0.001 | 1850 | 0.53 ± 0.47 | 0.63 ± 0.71 |
|  | Tufted Duck | *Aythya fuligula* | 512 ± 47 | 0.113 ± 0.024 | <0.001 | 1167 | 0.44 ± 0.46 | 0.69 ± 0.62 |
|  | Bluethroat | *Luscinia svecica* | NA | NA | NS | 1070 |  |  |
|  | Northern Shoveler | *Spatula clypeata* | 550 ± 51 | 0.111 ± 0.028 | <0.001 | 743 | 0.31 ± 0.18 | 0.52 ± 0.40 |
|  | Common Moorhen | *Gallinula chloropus* | 465 ± 40 | 0.157 ± 0.028 | <0.001 | 695 | 0.59 ± 0.63 | 0.70 ± 0.69 |
|  | Common Grasshopper Warbler | *Locustella naevia* | 427 ± 74 | 0.172 ± 0.056 | 0.002 | 618 | 0.37 ± 0.48 | 0.55 ± 0.45 |
|  | Great Crested Grebe | *Podiceps cristatus* | 550 ± 59 | 0.121 ± 0.035 | <0.001 | 591 | 0.49 ± 0.52 | 0.68 ± 0.68 |
|  | Savi’s Warbler | *Locustella luscinioides* | 950 ± 45 | 0.250 ± 0.063 | <0.001 | 517 | 0.46 ± 0.44 | 0.62 ± 0.63 |
|  | Common Cuckoo | *Cuculus canorus* | 550 ± 49 | 0.016 ± 0.003 | <0.001 | 506 | 0.32 ± 0.19 | 0.50 ± 0.38 |
|  | Mute Swan | *Cygnus olor* | 1228 ± 28 | -0.093 ± 0.011 | <0.001 | 427 |  |  |
|  | Water Rail | *Rallus aquaticus* | NA | NA | NS | 325 |  |  |
|  | Cetti's Warbler | *Cettia cetti* | 400 ± 81 | 0.148 ± 0.058 | 0.011 | 273 | 0.52 ± 0.38 | 0.57 ± 0.41 |
|  | Little Grebe | *Tachybaptus ruficollis* | NA | NA | NS | 183 |  |  |
|  | Bearded Reedling | *Panurus biarmicus* | 950 ± 48 | 0.522 ± 0.184 | 0.005 | 154 | 0.55 ± 0.39 | 0.83 ± 1.57 |
|  | Common Pochard | *Aythya ferina* | NA | NA | NS | 111 |  |  |
|  | Garganey | *Spatula querquedula* | NA | NA | NS | 102 |  |  |
|  | Western Marsh Harrier | *Circus aeruginosus* | NA | NA | NS | 92 |  |  |
|  | Eurasian Bittern | *Botaurus stellaris* | 950 ± 57 | 0.262 ± 0.082 | 0.002 | 81 | 0.26 ± 0.20 | 0.46 ± 0.30 |
|  | Eurasian Teal | *Anas crecca* | 650 ± 143 | 0.198 ± 0.075 | 0.013 | 63 | 0.26 ± 0.12 | 0.39 ± 0.25 |
|  | Spotted crake | *Porzana porzana* | NA | NA | NS | 23 |  |  |
|  | Black-necked Grebe | *Podiceps nigricollis* | NA | NA | NA | 9 |  |  |
|  | Eurasian Wigeon | *Mareca penelope* | NA | NA | NA | 6 |  |  |
|  | Eurasian Penduline Tit | *Remiz pendulinus* | NA | NA | NA | 5 |  |  |
|  | Little Bittern | *Ixobrychus minutus* | NA | NA | NA | 4 |  |  |
|  | Red-crested pochard | *Netta rufina* | NA | NA | NA | 3 |  |  |
|  | Great Reed Warbler | *Acrocephalus arundinaceus* | NA | NA | NA | 2 |  |  |
|  | Baillon’s Crake | *Zapornia pusilla* | NA | NA | NA | 1 |  |  |
|  | Little Crake | *Zapornia parva* | NA | NA | NA | 1 |  |  |
| Agricultural | Northern Lapwing | *Vanellus vanellus* | 1210 ± 37 | 0.045 ± 0.005 | <0.001 | 3109 | 0.61 ± 0.45 | 0.81 ± 0.71 |
|  | Black-tailed Godwit | *Limosa limosa* | 849 ± 42 | 0.080 ± 0.010 | <0.001 | 1877 | 0.51 ± 0.31 | 0.92 ± 0.87 |
|  | Common Redshank | *Tringa totanus* | 1189 ± 25 | 0.040 ± 0.006 | <0.001 | 1823 | 0.56 ± 0.38 | 0.67 ± 0.52 |
|  | Meadow Pipit | *Anthus pratensis* | 1000 ± 65 | 0.036 ± 0.008 | <0.001 | 1658 | 0.44 ± 0.26 | 0.55 ± 0.44 |
|  | Eurasian Oystercatcher | *Haematopus ostralegus* | NA | NA | NS | 1492 |  |  |
|  | Carrion Crow | *Corvus corone* | 1250 ± 56 | -0.035 ± 0.006 | <0.001 | 1073 | 0.46 ± 0.53 | 0.55 ± 0.44 |
|  | European Stonechat | *Saxicola rubicola* | 529 ± 80 | 0.092 ± 0.030 | 0.002 | 817 | 0.43 ± 0.45 | 0.72 ± 1.44 |
|  | Blue-headed Wagtail | *Motacilla flava* | NA | NA | NS | 742 |  |  |
|  | Skylark | *Alauda arvensis* | 568 ± 62 | 0.069 ± 0.023 | 0.002 | 592 | 0.39 ± 0.18 | 0.49 ± 0.30 |
|  | Icterine Warbler | *Hippolais icterina* | 1268 ± 16 | -0.044 ± 0.010 | <0.001 | 529 |  |  |
|  | White Wagtail | *Motacilla alba* | 1200 ± 62 | -0.027 ± 0.014 | 0.047 | 399 |  |  |
|  | Eurasian Magpie | *Pica pica* | NA | NA | NS | 294 |  |  |
|  | Grey Partridge | *Perdix perdix* | 950 ± 33 | 0.013 ± 0.002 | <0.001 | 135 | 0.61 ± 0.43 | 0.68 ± 0.64 |
|  | Common Snipe | *Gallinago gallinago* | NA | NA | NS | 111 |  |  |
|  | Curlew | *Numenius arquata* | 600 ± 76 | 0.175 ± 0.051 | <0.001 | 103 | 0.29 ± 0.14 | 0.36 ± 0.16 |
|  | Eurasian Tree Sparrow | *Passer montanus* | 950 ± 153 | 0.273 ± 0.043 | <0.001 | 86 | 0.33 ± 0.23 | 0.91 ± 1.46 |
|  | Common Quail | *Coturnix coturnix* | NA | NA | NA | 66 |  |  |
|  | European Turtle Dove | *Streptopelia turtur* | 500 ± 146 | 0.277 ± 0.133 | 0.045 | 64 | 0.31 ± 0.15 | 0.50 ± 028 |
|  | Common Kestrel | *Falco tinnunculus* | NA | NA | NA | 38 |  |  |
|  | Little Owl | *Athene vidalii* | NA | NA | NS | 24 |  |  |
|  | White Stork | *Ciconia ciconia* | NA | NA | NA | 20 |  |  |
|  | Grey Wagtail | *Motacilla cinerea* | NA | NA | NS | 18 |  |  |
|  | Corncrake | *Crex crex* | NA | NA | NA | 14 |  |  |
|  | Barn Owl | *Tyto alba* | NA | NA | NA | 8 |  |  |
|  | Ruff | *Calidris pugnax* | NA | NA | NA | 5 |  |  |
|  | Whinchat | *Saxicola rubetra* | NA | NA | NA | 5 |  |  |
|  | Red-backed Shrike | *Lanius collurio* | NA | NA | NA | 4 |  |  |
|  | Short-eared Owl | *Asio flammeus* | NA | NA | NA | 2 |  |  |
|  | Corn Bunting | *Emberiza calandra* | NA | NA | NA | 1 |  |  |
| Shrubland | Willow Warbler | *Phylloscopus trochilus* | 565 ± 49 | 0.074 ± 0.014 | <0.001 | 2911 | 0.65 ± 0.58 | 0.80 ± 0.74 |
|  | Common Whitethroat | *Sylvia communis* | 550 ± 45 | 0.081 ± 0.014 | <0.001 | 2786 | 0.58 ± 0.64 | 0.71 ± 0.96 |
|  | Common Pheasant | *Phasianus colchicus* | 433 ± 49 | 0.146 ± 0.031 | <0.001 | 1006 | 0.45 ± 0.38 | 0.66 ± 0.62 |
|  | Lesser Whitethroat | *Sylvia curruca* | 650 ± 129 | 0.072 ± 0.032 | 0.027 | 155 | 0.38 ± 0.31 | 0.54 ± 0.91 |
| Heathland | Tree Pipit | *Anthus trivialis* | 581 ± 56 | 0.153 ± 0.003 | <0.001 | 817 | 0.41 ± 0.38 | 0.60 ± 0.75 |
|  | Common Linnet | *Linaria cannabina* | NA | NA | NS | 604 |  |  |
|  | Common Redstart | *Phoenicurus phoenicurus* | 615 ± 48 | 0.134 ± 0.030 | <0.001 | 570 | 0.49 ± 0.79 | 0.52 ± 0.48 |
|  | Yellowhammer | *Emberiza citrinella* | NA | NA | NS | 370 |  |  |
|  | Woodlark | *Lullula arborea* | NA | NA | NS | 53 |  |  |
|  | European Nightjar | *Caprimulgus europaeus* | 1050 ± 110 | 0.100 ± 0.029 | 0.002 | 50 | 0.33 ± 0.12 | 0.41 ± 0.30 |
|  | Eurasian Wryneck | *Jynx torquilla* | NA | NA | NA | 1 |  |  |
|  | Northern Wheatear | *Oenanthe oenanthe* | NA | NA | NA | 1 |  |  |
| Coast | Common Shelduck | *Tadorna tadorna* | 365 ± 65 | 0.112 ± 0.039 | 0.004 | 650 | 0.37 ± 0.38 | 0.51 ± 0.44 |
|  | Common Ringed Plover | *Charadrius hiaticula* | NA | NA | NS | 53 |  |  |
|  | Great Black-backed Gull | *Larus marinus* | NA | NA | NA | 6 |  |  |
| Pioneer vegetation | Little Ringed Plover | *Charadrius dubius* | 550 ± 161 | -0.076 ± 0.024 | 0.002 | 195 | 0.48 ± 0.26 | 0.79 ± 0.23 |
|  | Kentish Plover | *Anarhynchus alexandrinus* | NA | NA | NA | 8 |  |  |
|  | Common Sandpiper | *Actitis hypoleucos* | NA | NA | NA | 1 |  |  |
| Streams | Kingfisher | *Alcedo atthis* | 550 ± 73 | 0.352 ± 0.073 | <0.001 | 108 | 0.36 ± 0.37 | 0.58 ± 0.51 |
| Urban | Eurasian Collared Dove | *Streptopelia decaocto* | 1207 ± 323 | -0.114 ± 0.041 | 0.009 | 58 |  |  |
|  | Black Redstart | *Phoenicurus ochruros* | NA | NA | NS | 36 |  |  |
