# Supplementary material for: Road traffic has a consistent negative impact on a wide range of bird species in different habitats
Source: Research Square preprint supplement (doi:10.21203/rs.3.rs-5548583/v1), 2025-01-13
Supplement: Supplementary file 2 [file dbc1df6e822583b0d78ff82e.docx]

Online Resource 1 Species and species groups

| ***Species (common)*** | ***Species (scientific)*** | ***Ecological group*** | ***Vocal communication important*** |
| --- | --- | --- | --- |
| Baillon’s Crake | *Zapornia pusilla* | Marsh | no |
| Barn Owl | *Tyto alba* | Agricultural | no |
| Bearded Reedling | *Panurus biarmicus* | Marsh | yes |
| Black Redstart | *Phoenicurus ochruros* | Urban | yes |
| Black Woodpecker | *Dryocopus martius* | Forest | no |
| Black-necked Grebe | *Podiceps nigricollis* | Marsh | no |
| Black-tailed Godwit | *Limosa limosa* | Agricultural | no |
| Blue-headed Wagtail | *Motacilla flava* | Agricultural | yes |
| Bluethroat | *Luscinia svecica* | Marsh | yes |
| Carrion Crow | *Corvus corone* | Agricultural | no |
| Cetti's Warbler | *Cettia cetti* | Marsh | yes |
| Coal Tit | *Periparus ater* | Forest | yes |
| Common Blackbird | *Turdus merula* | Forest | yes |
| Common Buzzard | *Buteo buteo* | Forest | no |
| Common Chaffinch | *Fringilla coelebs* | Forest | yes |
| Common Chiffchaff | *Phylloscopus collybita* | Forest | yes |
| Common Cuckoo | *Cuculus canorus* | Marsh | yes |
| Common Firecrest | *Regulus ignicapilla* | Forest | yes |
| Common Grasshopper Warbler | *Locustella naevia* | Marsh | yes |
| Common Kestrel | *Falco tinnunculus* | Agricultural | no |
| Common Linnet | *Linaria cannabina* | Heathland | yes |
| Common Moorhen | *Gallinula chloropus* | Marsh | no |
| Common Nightingale | *Luscinia megarhynchos* | Forest | yes |
| Common Pheasant | *Phasianus colchicus* | Shrubland | no |
| Common Pochard | *Aythya ferina* | Marsh | no |
| Common Quail | *Coturnix coturnix* | Agricultural | yes |
| Common Redshank | *Tringa totanus* | Agricultural | no |
| Common Redstart | *Phoenicurus phoenicurus* | Heathland | yes |
| Common Ringed Plover | *Charadrius hiaticula* | Coast | no |
| Common Sandpiper | *Actitis hypoleucos* | Pioneer vegetation | no |
| Common Shelduck | *Tadorna tadorna* | Coast | no |
| Common Snipe | *Gallinago gallinago* | Agricultural | no |
| Common Starling | *Sturnus vulgaris* | Forest | yes |
| Common Whitethroat | *Sylvia communis* | Shrubland | yes |
| Common Wood Pigeon | *Columba palumbus* | Forest | yes |
| Corn Bunting | *Emberiza calandra* | Agricultural | yes |
| Corncrake | *Crex crex* | Agricultural | yes |
| Crossbill | *Loxia curvirostra* | Forest | yes |
| Curlew | *Numenius arquata* | Agricultural | no |
| Dunnock | *Prunella modularis* | Forest | yes |
| Eurasian Bittern | *Botaurus stellaris* | Marsh | yes |
| Eurasian Blackcap | *Sylvia atricapilla* | Forest | yes |
| Eurasian Blue Tit | *Cyanistes caeruleus* | Forest | yes |
| Eurasian Bullfinch | *Pyrrhula pyrrhula* | Forest | yes |
| Eurasian Collared Dove | *Streptopelia decaocto* | Urban | yes |
| Eurasian Coot | *Fulica atra* | Marsh | no |
| Eurasian Golden Oriole | *Oriolus oriolus* | Forest | yes |
| Eurasian Green Woodpecker | *Picus viridis* | Forest | no |
| Eurasian Hobby | *Falco subbuteo* | Forest | no |
| Eurasian Jay | *Garrulus glandarius* | Forest | no |
| Eurasian Magpie | *Pica pica* | Agricultural | no |
| Eurasian Nuthatch | *Sitta europea* | Forest | yes |
| Eurasian Oystercatcher | *Haematopus ostralegus* | Agricultural | no |
| Eurasian Penduline Tit | *Remiz pendulinus* | Marsh | yes |
| Eurasian Reed Warbler | *Acrocephalus scirpaceus* | Marsh | yes |
| Eurasian Siskin | *Spinus spinus* | Forest | yes |
| Eurasian Sparrowhawk | *Accipiter nisus* | Forest | no |
| Eurasian Teal | *Anas crecca* | Marsh | no |
| Eurasian Tree Sparrow | *Passer montanus* | Agricultural | yes |
| Eurasian Wigeon | *Mareca penelope* | Marsh | no |
| Eurasian Wren | *Nannus troglodytes* | Forest | yes |
| Eurasian Wryneck | *Jynx torquilla* | Heathland | no |
| European Crested Tit | *Lophophanus cristatus* | Forest | yes |
| European Goldfinch | *Carduelis carduelis* | Forest | yes |
| European Greenfinch | *Chloris chloris* | Forest | yes |
| European Honey Buzzard | *Pernis apivorus* | Forest | no |
| European Nightjar | *Caprimulgus europaeus* | Heathland | yes |
| European Pied Flycatcher | *Ficedula hypoleuca* | Forest | yes |
| European Robin | *Erithacus rubecula* | Forest | yes |
| European Stonechat | *Saxicola rubicola* | Agricultural | yes |
| European Turtle Dove | *Streptopelia turtur* | Agricultural | yes |
| Gadwall | *Mareca strepera* | Marsh | no |
| Garden Warbler | *Sylvia borin* | Forest | yes |
| Garganey | *Spatula querquedula* | Marsh | no |
| Goldcrest | *Regulus regulus* | Forest | yes |
| Great Black-backed Gull | *Larus marinus* | Coast | no |
| Great Crested Grebe | *Podiceps cristatus* | Marsh | no |
| Great Reed Warbler | *Acrocephalus arundinaceus* | Marsh | yes |
| Great Spotted Woodpecker | *Dendrocopos major* | Forest | no |
| Great Tit | *Parus major* | Forest | yes |
| Grey Partridge | *Perdix perdix* | Agricultural | no |
| Grey Wagtail | *Motacilla cinerea* | Agricultural | yes |
| Hawfinch | *Coccothraustes coccothraustes* | Forest | yes |
| Icterine Warbler | *Hippolais icterina* | Agricultural | yes |
| Kentish Plover | *Anarhynchus alexandrinus* | Pioneer vegetation | no |
| Kingfisher | *Alcedo atthis* | Streams | no |
| Lesser Spotted Woodpecker | *Dryobates minor* | Forest | no |
| Lesser Whitethroat | *Sylvia curruca* | Shrubland | yes |
| Little Bittern | *Ixobrychus minutus* | Marsh | yes |
| Little Crake | *Zapornia parva* | Marsh | no |
| Little Grebe | *Tachybaptus ruficollis* | Marsh | no |
| Little Owl | *Athene vidalii* | Agricultural | no |
| Little Ringed Plover | *Charadrius dubius* | Pioneer vegetation | no |
| Long-eared Owl | *Asio otus* | Forest | no |
| Long-tailed Tit | *Aegithalos caudatus* | Forest | yes |
| Mallard | *Anas platyrhynchos* | Marsh | no |
| Marsh tit | *Poecile palustris* | Forest | yes |
| Marsh Warbler | *Acrocephalus palustris* | Marsh | yes |
| Meadow Pipit | *Anthus pratensis* | Agricultural | yes |
| Middle Spotted Woodpecker | *Dendropicos medius* | Forest | no |
| Mistle Thrush | *Turdus viscivorus* | Forest | yes |
| Mute Swan | *Cygnus olor* | Marsh | no |
| Northern Goshawk | *Accipiter gentilis* | Forest | no |
| Northern Lapwing | *Vanellus vanellus* | Agricultural | no |
| Northern Raven | *Corvus corax* | Forest | no |
| Northern Shoveler | *Spatula clypeata* | Marsh | no |
| Northern Wheatear | *Oenanthe oenanthe* | Heathland | yes |
| Red Kite | *Milvus milvus* | Forest | no |
| Red-backed Shrike | *Lanius collurio* | Agricultural | yes |
| Red-crested pochard | *Netta rufina* | Marsh | no |
| Reed Bunting | *Emberiza schoeniclus* | Marsh | yes |
| Ruff | *Calidris pugnax* | Agricultural | no |
| Savi’s Warbler | *Locustella luscinioides* | Marsh | yes |
| Sedge Warbler | *Acrocephalus schoenobaenus* | Marsh | yes |
| Short-eared Owl | *Asio flammeus* | Agricultural | no |
| Short-toed Treecreeper | *Certhia brachydactyla* | Forest | yes |
| Skylark | *Alauda arvensis* | Agricultural | yes |
| Song Thrush | *Turdus philomelos* | Forest | yes |
| Spotted crake | *Porzana porzana* | Marsh | yes |
| Spotted Flycatcher | *Muscicapa striata* | Forest | yes |
| Stock Dove | *Columba oenas* | Forest | yes |
| Tawny Owl | *Strix aluco* | Forest | no |
| Tree Pipit | *Anthus trivialis* | Heathland | yes |
| Treecreeper | *Certhia familiaris* | Forest | yes |
| Tufted Duck | *Aythya fuligula* | Marsh | no |
| Water Rail | *Rallus aquaticus* | Marsh | no |
| Western Marsh Harrier | *Circus aeruginosus* | Marsh | no |
| Whinchat | *Saxicola rubetra* | Agricultural | yes |
| White Stork | *Ciconia ciconia* | Agricultural | no |
| White Wagtail | *Motacilla alba* | Agricultural | yes |
| Willow Tit | *Poecile montanus* | Forest | yes |
| Willow Warbler | *Phylloscopus trochilus* | Shrubland | yes |
| Wood Warbler | *Phylloscopus sibilatrix* | Forest | yes |
| Woodcock | *Scolopax rusticola* | Forest | no |
| Woodlark | *Lullula arborea* | Heathland | yes |
| Yellowhammer | *Emberiza citrinella* | Heathland | yes |
